# Supplementary material for: Roxadustat prevents Ang II hypertension by targeting angiotensin receptors and eNOS
Source: JCI journal article supplement (doi:10.1172/jci.insight.133690), 2021-08-17
Supplement: sd1 [file 1]

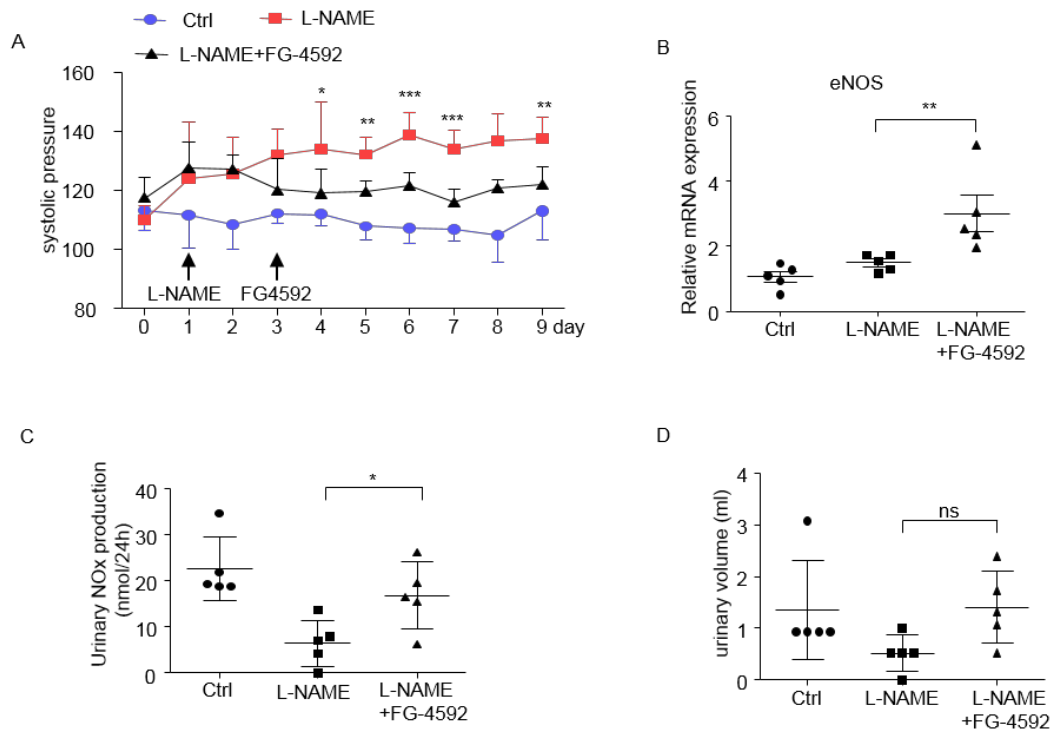

**Fig. S1 L-NAME-induced hypertension is partially blunted by FG-4592 administration.** (A). Systolic blood pressure measured by tail cuff for 9 days was partially blunted in the FG-4592 treatment group. L-NAME was administered in drinking water at 1.3 mg/ml. FG-4592 was given to mice after administration of L-NAME for two days. The mice treated with FG-4592 and L-NAME showed a significant decrease in systolic pressure relative to the mice treated with L-NAME alone. (B) The mRNA expression of eNOS was detected in aorta tissue by QPCR. (C) Urinary NO production. (D) urine volume. Data are presented as mean  $\pm$  SD (n = 5 per group). Significance values were determined by one-way ANOVA test. Newman-Keuls multiple comparisons test was used for multiple comparison. Ctrl = DMSO in saline. \*  $p < 0.05$ , \*\* $p < 0.01$ , \*\*\* $p < 0.001$ .

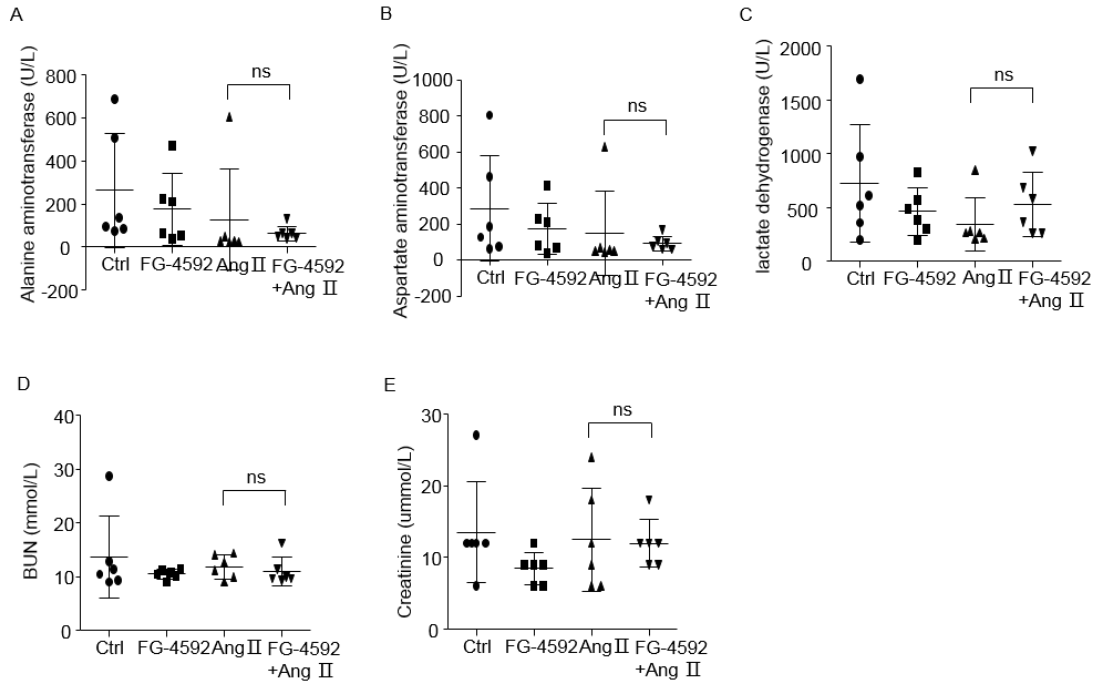

**Fig. S2 Effects of FG-4592 on organ functions in mice with or without Ang II treatment.** Serum ALT(A), AST(B), LDH (C), BUN (D), and Cr (E). Data are presented as mean  $\pm$  SD (n = 6 per group). Significance values were determined by one-way ANOVA test. Newman-Keuls multiple comparisons test was used for multiple comparison. Ctrl = DMSO in saline.
